# Supplementary material for: Combining Chamber Experiments and Model Simulations to Evaluate an Indoor HONO Source with Surface Photochemical Properties
Source: Hindawi journal article supplement (doi:10.1155/2023/3605937), 2023-10-06
Supplement: f1 [file 3605937.f1.docx]

**Supplementary Materials for**

**Combining chamber experiments and model simulation to evaluate an indoor HONO source with surface photochemical properties**

Youfeng Wang1,2, Chong Zhang1, Jianshu Wang1, Yaru Wang1, Yingjie Zhang1,3, Weili Lin4, and Chunxiang Ye[[1]](#footnote-1)*1

*Corresponding author. E-mail address: c.ye@pku.edu.cn.

1SKL-ESPC, College of Environmental Sciences and Engineering, Center for Environment and Health, Peking University, Beijing, China

2Beijing Municipal Ecological and Environmental Monitoring Center, Beijing, China.

3School of Ecology and Nature Conservation, Beijing Forestry University, Beijing 100083, China.

4College of Life and Environmental Sciences, Minzu University of China, Beijing, China.

This file includes:

Figures S1 to S7

Tables S1 to S3

**Keywords**: photolysis of surface nitrate; outdoor photochemical chamber (OPC) experiment; indoor photochemical model (ICM); HONO budget analysis; indoor HONO accumulation


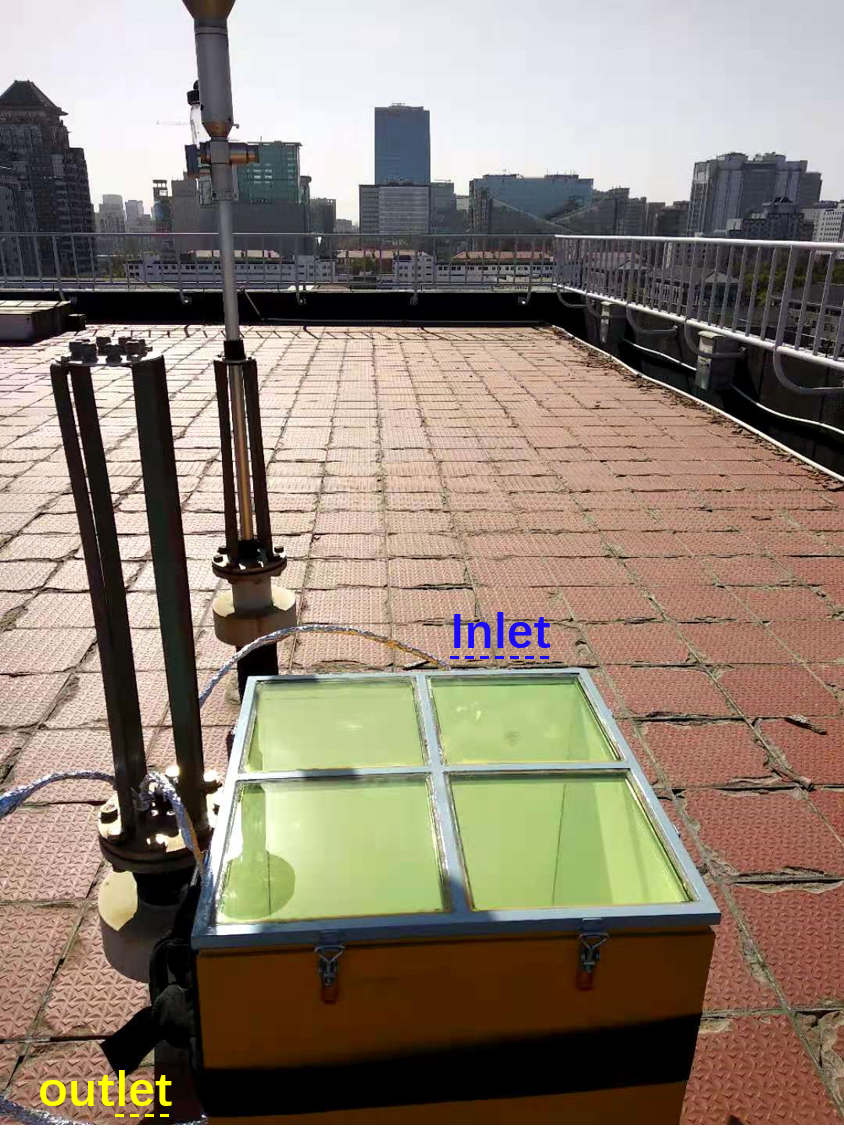


Figure S1. Configuration of the outdoor photochemical chamber (OPC) at the PKU site; the inlet tube was used to pass the low-NO2 air or high-NO2 air into the chamber during Oct. 27–30, 2020.





Figure S2. Transmittance of the glass filter used for the outdoor photochemical chamber (OPC), and high, medium, and low transmittance setup for the indoor photochemical model (ICM).





Figure S3. Outdoor solar flux measured in Beijing on 12:30, October 5, 2020, and LED flux for the indoor photochemical model (ICM).





Figure S4. Time series of HONO and NO2 mixing ratios in “low-NO2” (daytime on Oct. 27 and 28) and “high-NO2 air” (daytime on Oct. 29) OPC experiments.





Figure S5. The reactive cross section () obtained by comparing the between the OPC experiment and our previous laboratory-measured (Wang et al. 2023).





Figure S6. Correlation of HONO concentration in the outdoor photochemical chamber (HONO_indoor) with NO2 (NO2_indoor), *Jnitrate*, RH, and temperature (Temp.) during the night (plot in black circle) and day (plot in red square), respectively. *Jnitrate* was calculated based on the measured solar flux, glass transmittance, and reactive cross-section of surface nitrate (Wang et al. 2023) assuming an average surface nitrate density (1×10-4 mole m-2) (Baergen and Donaldson 2019, Schwartz-Narbonne and Donaldson 2019).





Figure S7. Diel profiles of ambient temperature (Temp.) and relative humidity (RH) and their respective correlation with the unknown source rate of HONO (missing source) during the OPC experiments.

Table S1. Overview of photoenhanced uptake coefficients (γ) of heterogeneous NO2 reactions to produce HONO on various surfaces.

| Reference | Surface | Result |
| --- | --- | --- |
| (Gustafsson et al. 2006) | Titanium dioxide aerosol surface | γ ranged from 9.6 × 10-4 for 15% RH to 1.2 × 10-4 for 80% RH when irradiated by UV light (16 W m-2) |
| (Monge et al. 2010) | Soot particle | γ ranged from 5 × 10-7 for 16 ppb NO2 to 5 × 10-8 for 120 ppb NO2; γ increased from 4 × 10-8 for 4×1014 photons cm-2 s-1 irradiation to 1.6 × 10-7 for 1×1015 photons cm-2 s-1 irradiation in the 300-400 nm range |
| (Ammar et al. 2010) | Pyrene/KNO3 mixture as a proxy of urban grime | Exposed to 50 ppb NO2, γ ranged from 1.12×10−7 in the dark to 2.67×10−6 under near-UV irradiation (300–420 nm); γ decreased with increasing NO2 concentration (30–120 ppbv); NO2 removal is linearly dependent on light intensity |
| (Brigante et al. 2008) | Pyrene solid films | γ ranged from below 10−7 in the dark to 3.5 × 10−6 under near-UV irradiation (9.5 × 1014 photons cm−2 s−1), γ decreased with increasing NO2 concentration (20–119 ppbv); Reactivity depended linearly on light intensity |
| **(Sosedova et al. 2011)** | Polyphenolic films: Gentisic acid (GA)  Tannic acid (TA)  Methylene blue (MB) | γ = 4.8×10−7 on GA for irradiation range (300-420 nm); γ = 8.8×10−7 on GA/MB for irradiation range (400-750 nm); γ = 3.3×10−7 on TA for irradiation range (300-420 nm); γ = 2.2×10−7 on TA/MB for irradiation range (400-750 nm) |
| (George et al. 2005) | Solid organic compounds | Uptake on light absorbing aromatic compounds was significantly enhanced when irradiated with light of 300–420 nm, γ exceeds that of the dark reaction by one (or more than one) order of magnitude |
| **(Stemmler et al. 2006)** | Humic acid films | γ = 2.0×10−5 for an irradiance of 162 W m-2 (400-750 nm), which was a factor of 30 greater than production in the dark; NO2 reactivity under UV (300-420 nm) about larger by a factor of 2 than that under visible light. |
| **(Stemmler et al. 2007)** | Humic acid aerosol particles | γ <10−7 in the dark, increases with increasing actinic fluxes to γ = 1.8×10−6 at the maximum actinic flux of 1 × 1017 photons cm−2 s−1 (integrated 400-750 nm) |
| **(Han et al. 2016)** | Humic acid surface | γ increased from (1.67 ± 0.14) × 10–6 at 68.5 W/m2 to (4.37 ± 0.45) × 10–6 at 194.5 W/m2; γ in the dark was extrapolated to be (1.89 ± 3.05) × 10–7, which is 23 times less than the value obtained at the highest intensity (194.5 W/m2). |
| (Liu et al. 2020) | Glass windows | In the dark, γ ~10-8 for the bedroom and living room, increases from 1 × 10–7 (RH~0%) to 1× 10–6 (RH~90%) depending linearly on RH for the kitchen; In the presence of UV-light (8 W m-2 for 300 < λ < 400 nm), γ on both the living room and bedroom window glass increase 1 order of magnitude from 1.5 × 10-7 at 0% RH to ~1.5 × 10-6 at 90% RH, on the glass plates from the kitchen increased markedly from (2.3 ± 0.1) × 10-6 at 0% RH to (4.1 ± 0.5) × 10-6 at 90% RH. |
| (Gandolfo et al. 2017) | Indoor photocatalytic paints (TiO2) | γ increase from 5.1 × 10-6 at 290 K to 1.5 × 10-5 at 305 K. γ of 1.4 × 10-5 in the temperature range between 305 and 313 K (UV light340-400 nm, 8.5 W m-2). |
| (Gomez Alvarez et al. 2014) | Household chemicals | HONO reactive uptake coefficients in the presence of light (350-400 nm) were determined to be 1.6×10-7 for borosilicate glass, 4.3×10-7 for bathroom cleaner, 1.0×10-6 for floor cleaner, 1.3×10-6 for white wall paint and 2.6×10-6 for lacquer. |
| (Yu et al. 2021) | Inorganic particles, sea water and urban grime | In the dark, γ varied from <10−8 to 3.2 × 10−7 under different humidity. In the presence of UV-visible light (300-800 nm), γ was measured to be 1.9 × 10−6 at 5% RH and 5.8 × 10−6 at 70% RH on urban grime. |
| (Liu et al. 2019) | Real urban grime | In the presence of UV light [2.6 × 1015 photons cm-2 s-1 (300-400 nm)], γ increased from (1.1 ± 0.2) × 10-6 at 0% RH to (5.8 ± 0.7) × 10-6 at 90% RH. |

Table S2: Summary of the setup of the outdoor photochemical chamber (OPC) and simulated room in our constructed indoor photochemical model (ICM).

| Chamber | Dimension, m | S/V, m-1 | Ventilation rate, h-1 | Window transmittance @ 500 nm and cutoff wavelength | Sunlit area |
| --- | --- | --- | --- | --- | --- |
| OPC | 0.5×0.5×0.5 | 12 | 2 | 89% and 425 nm | Twice the roof area |
| Simulated room | 5×3×2.4 | 1.9 | 2 | 65% and 325 nm | The roof area |

Table S3: Summary for scenarios considered in the outdoor photochemical chamber (OPC) experiment and indoor photochemical model (ICM).

| Models | Scenario | note |
| --- | --- | --- |
| OPC chamber | Solar radiation | Photo-enhanced reaction of NO2 on the surface was considered |
| LED lamps | Not considered |
| The simulated room | S1 | Transmittance high and γ0normal room (1 × 10−8) |
| S2 | Transmittance medium and γ0normal room (1 × 10−8) |
| S3 | Transmittance low and γ0nornal room (1 × 10−8) |
| S4 | Transmittance high and γ0kitchen (5× 10−7) |

**References**:

Ammar, R., Monge, M.E., George, C. and D'Anna, B. (2010) Photoenhanced NO2 loss on simulated urban grime. Chemphyschem 11(18), 3956-3961.

Baergen, A.M. and Donaldson, D.J. (2019) Seasonality of the water-soluble inorganic ion composition and water uptake behavior of urban grime. Environmental Science & Technology 53(10), 5671-5677.

Brigante, M., Cazoir, D., D'Anna, B., George, C. and Donaldson, D.J. (2008) Photoenhanced uptake of NO2 by pyrene solid films. Journal of Physical Chemistry A 112(39), 9503-9508.

Gandolfo, A., Rouyer, L., Wortham, H. and Gligorovski, S. (2017) The influence of wall temperature on NO2 removal and HONO levels released by indoor photocatalytic paints. Applied Catalysis B-Environmental 209, 429-436.

George, C., Strekowski, R.S., Kleffmann, J., Stemmler, K. and Ammann, M. (2005) Photoenhanced uptake of gaseous NO2 on solid-organic compounds: a photochemical source of HONO? Faraday Discussions 130, 195-210.

Gomez Alvarez, E., Soergel, M., Gligorovski, S., Bassil, S., Bartolomei, V., Coulomb, B., Zetzsch, C. and Wortham, H. (2014) Light-induced nitrous acid (HONO) production from NO2 heterogeneous reactions on household chemicals. Atmospheric Environment 95, 391-399.

Gustafsson, R.J., Orlov, A., Griffiths, P.T., Cox, R.A. and Lambert, R.M. (2006) Reduction of NO2 to nitrous acid on illuminated titanium dioxide aerosol surfaces: implications for photocatalysis and atmospheric chemistry. Chemical Communications (37), 3936-3938.

Han, C., Yang, W., Wu, Q., Yang, H. and Xue, X. (2016) Heterogeneous photochemical conversion of NO2 to HONO on the humic acid surface under simulated sunlight. Environmental Science & Technology 50(10), 5017-5023.

Liu, J., Deng, H., Lakey, P.S.J., Jiang, H., Mekic, M., Wang, X., Shiraiwa, M. and Gligorovski, S. (2020) Unexpectedly high indoor HONO concentrations associated with photochemical NO2 transformation on glass windows. Environmental Science & Technology 54(24), 15680-15688.

Liu, J., Li, S., Mekic, M., Jiang, H., Zhou, W., Loisel, G., Song, W., Wang, X. and Gligorovski, S. (2019) Photoenhanced uptake of NO2 and HONO formation on real urban grime. Environmental Science & Technology Letters 6(7), 413-417.

Monge, M.E., D'Anna, B., Mazri, L., Giroir-Fendler, A., Ammann, M., Donaldson, D.J. and George, C. (2010) Light changes the atmospheric reactivity of soot. Proceedings of the National Academy of Sciences of the United States of America 107(15), 6605-6609.

Schwartz-Narbonne, H. and Donaldson, D.J. (2019) Water uptake by indoor surface films. Scientific reports 9.

Sosedova, Y., Rouviere, A., Bartels-Rausch, T. and Ammann, M. (2011) UVA/Vis-induced nitrous acid formation on polyphenolic films exposed to gaseous NO2. Photochemical & Photobiological Sciences 10(10), 1680-1690.

Stemmler, K., Ammann, M., Donders, C., Kleffmann, J. and George, C. (2006) Photosensitized reduction of nitrogen dioxide on humic acid as a source of nitrous acid. Nature 440(7081), 195-198.

Stemmler, K., Ndour, M., Elshorbany, Y., Kleffmann, J., D'Anna, B., George, C., Bohn, B. and Ammann, M. (2007) Light induced conversion of nitrogen dioxide into nitrous acid on submicron humic acid aerosol. Atmospheric Chemistry and Physics 7(16), 4237-4248.

Wang, Y., Wang, J., Wang, Y., Zhang, Y., Woodward-Massey, R., Zhang, C., Kuang, Y., Zhu, J., Shang, J., Li, X., Zeng, L., Lin, W. and Ye, C. (2023) Experimental and kinetic model evaluation of HONO production from surface nitrate photolysis. Atmospheric Environment 296, 119568.

Yu, C., Wang, Z., Ma, Q., Xue, L., George, C. and Wang, T. (2021) Measurement of heterogeneous uptake of NO2 on inorganic particles, sea water and urban grime. Journal of Environmental Sciences 106, 124-135.

1. *Corresponding author. *E-mail address:* c.ye@pku.edu.cn. [↑](#footnote-ref-1)
